1 **Disruption of cortical dopaminergic modulation impairs preparatory activity and delays**  
2 **licking initiation**

3

4 Abbreviated title: Dopaminergic modulation of licking initiation

5

6

7 Ke Chen<sup>1,2</sup>, Roberto Vincis<sup>1</sup>, Alfredo Fontanini<sup>1,2</sup>

8

9 <sup>1</sup> Department of Neurobiology and Behavior and <sup>2</sup> Graduate Program in Neuroscience, State  
10 University of New York at Stony Brook, Stony Brook, NY, 11794, USA

11

12 Corresponding authors: Ke Chen and Alfredo Fontanini

13 Department of Neurobiology and Behavior

14 Room 545, Life Science Building

15 SUNY at Stony Brook

16 Stony Brook, 11794, NY, USA.

17 Tel: +1 631 632 3242

18 Email: [alfredo.fontanini@stonybrook.edu](mailto:alfredo.fontanini@stonybrook.edu) or [ke.chen@stonybrook.edu](mailto:ke.chen@stonybrook.edu)

19

20 **Number of pages:** 39

21 **Number of figures:** 7

22 **Number of words:**

23 Abstract: 174

24 Introduction: 581

25 Discussion: 1467

26

27 **Conflicts of interest:**

28 The authors declare that no competing interests exist.

29 **Acknowledgements:**

30 The authors would like to acknowledge Dr. Arianna Maffei, Dr. Craig Evinger, Dr. Joshua L.

31 Plotkin, past and present members of the Fontanini and Maffei's laboratories for their feedback

32 and insightful comments. This work has been supported by the Thomas Hartman Foundation for

33 Parkinson Research.

34

35 **ABSTRACT**

36 Dysfunction of motor cortices is thought to contribute to motor disorders such as Parkinson's  
37 disease (PD). However, little is known on the link between cortical dopaminergic loss,  
38 abnormalities in motor cortex neural activity and motor deficits. We address the role of dopamine  
39 in modulating motor cortical activity by focusing on the anterior lateral motor cortex (ALM) of  
40 mice performing a cued-licking task. We first demonstrate licking deficits and concurrent  
41 alterations of spiking activity in ALM of mice with unilateral depletion of dopaminergic neurons  
42 (i.e., mice injected with 6-OHDA into the medial forebrain bundle). Hemi-lesioned mice displayed  
43 delayed licking initiation, shorter duration of licking bouts, and lateral deviation of tongue  
44 protrusions. In parallel with these motor deficits, we observed a reduction in the prevalence of cue  
45 responsive neurons and altered preparatory activity. Acute and local blockade of D1 receptors in  
46 ALM recapitulated some of the key behavioral and neural deficits observed in hemi-lesioned mice.  
47 Altogether, our data show a direct relationship between cortical D1 receptor modulation, cue-  
48 evoked and preparatory activity in ALM, and licking initiation.

49 **SIGNIFICANCE STATEMENT**

50 The link between dopaminergic signaling, motor cortical activity and motor deficits is not fully  
51 understood. This manuscript describes alterations in neural activity of the anterior lateral motor  
52 cortex (ALM) that correlate with licking deficits in mice with unilateral dopamine depletion or  
53 with intra-ALM infusion of dopamine antagonist. The findings emphasize the importance of  
54 cortical dopaminergic modulation in motor initiation. These results will appeal not only to  
55 researchers interested in cortical control of licking, but also to a broader audience interested in  
56 motor control and dopaminergic modulation in physiological and pathological conditions.  
57 Specifically, our data suggest that dopamine deficiency in motor cortex could play a role in the  
58 pathogenesis of the motor symptoms of Parkinson's disease.

59

## 60 INTRODUCTION

61 Dysfunction of motor cortices, which are important for movement planning, initiation and  
62 execution, has been suggested to play a role in the motor symptoms of Parkinson's disease (PD)  
63 (Lindenbach and Bishop, 2013). Studies on motor cortices of human patients and animal models  
64 of PD revealed abnormalities in preparatory activity, excitability, excitation/inhibition balance and  
65 oscillatory dynamics (Doudet et al., 1990; Ridding et al., 1995; Goldberg et al., 2002; Escola et  
66 al., 2003; Lefaucheur, 2005; Pasquereau and Turner, 2011; Pasquereau et al., 2015). However, it  
67 is unclear whether abnormal patterns of motor cortical activity are secondary to dysfunction of the  
68 basal ganglia or whether they result from disruption of local dopaminergic modulation. Midbrain  
69 dopaminergic neurons project to the striatum and motor cortex. While dopaminergic innervation  
70 to the striatum has been studied extensively for its modulatory role on motor initiation and  
71 execution, studies on dopaminergic innervation to the motor cortex have been more limited and  
72 focused mostly in its role in synaptic plasticity and motor skill learning (Molina-Luna et al., 2009;  
73 Guo et al., 2015). To date, little is known about the direct link between loss of dopaminergic  
74 signaling in the motor cortex, alterations of motor cortical single unit activity, and corresponding  
75 motor deficits.

76 Here, we investigate the role of motor cortex dopaminergic transmission in movement initiation  
77 and execution. We focus on the anterior lateral motor cortex (ALM) of mice engaged in a cued-  
78 licking task. Licking was chosen because it is an innate motor behavior whose cortical control is  
79 well-studied. In rodents, licking is regulated by a central pattern generator circuit in the brainstem,  
80 which is under the control of the motor cortex (Travers et al., 1997). ALM plays an important role  
81 in the planning and execution of licking (Komiyama et al., 2010; Guo et al., 2014; Li et al., 2015;  
82 Inagaki et al., 2018), as reflected by the presence of neurons whose firing rates are modulated

83 before the onset of licking (defined as “preparatory” neurons) (Guo et al., 2014; Li et al., 2015;  
84 Chen et al., 2017; Inagaki et al., 2018). In addition, this area appears to be responsible for  
85 controlling the direction of tongue movements, as unilateral optogenetic silencing of ALM can  
86 introduce a directional bias towards the ipsilateral side (Guo et al., 2014; Li et al., 2015). Although  
87 ALM has been studied for its involvement in controlling normal licking, how lack of dopaminergic  
88 signaling impacts activity and function of this region remains unknown.

89 The experiments described here rely on behavioral training, pharmacology, and  
90 electrophysiological recordings to study licking deficits and related abnormalities of ALM neural  
91 activity in the context of unilateral dopamine depletion (i.e., unilateral injection of 6-OHDA into  
92 the medial forebrain bundle). This manipulation has been classically used to model some of the  
93 features of PD (Lundblad et al., 2004; Thiele et al., 2012; Jagmag et al., 2016). First, we show that  
94 mice with unilateral dopamine depletion display delayed licking initiation, shorter duration of  
95 licking bouts, and deviated tongue protrusions compared to control mice. Next, we report changes  
96 in cue responses and preparatory activity for neurons in ALM of 6-OHDA lesioned mice. Finally,  
97 we perform local pharmacological blockade of dopaminergic receptors to determine the  
98 contribution of cortical dopaminergic deficit in ALM to the electrophysiological and behavioral  
99 alterations seen in 6-OHDA lesioned mice.

100 Using licking as a model behavior, our data show motor deficits and abnormalities in neural  
101 activity associated with unilateral dopamine depletion. The results demonstrate the importance of  
102 cortical dopaminergic modulation for motor initiation and for modulating preparatory activity.

103

## 104 **MATERIALS AND METHODS**

### 105 **Experimental subjects**

106 The experiments were performed on adult male mice (C57BL/6, 12-20 weeks old, Charles  
107 River). Mice were group housed and maintained on a 12 h light/dark cycle with *ad libitum* access  
108 to food and water unless otherwise specified. All experimental protocols were approved by the  
109 Institutional Animal Care and Use Committee at Stony Brook University, and complied with  
110 university, state, and federal regulations on the care and use of laboratory animals.

111

### 112 **Surgical procedures for 6-OHDA injections in the medial forebrain bundle**

113 Mice were anesthetized with isoflurane (1-1.5%) in oxygen (1 L/min). Once fully anesthetized,  
114 mice were placed on a stereotaxic apparatus. The scalp was cut open to expose the skull and a hole  
115 was drilled above the medial forebrain bundle (MFB, anterior-posterior: -1.2 mm, medial-lateral:  
116 1.3 mm, dorsal-ventral: -4.75 mm). In a first group of mice (referred hereafter as 6-OHDA  
117 lesioned), 3.5 µg 6-OHDA dissolved in 1 µl 0.02% ascorbic acid (vehicle, prepared from sterile  
118 saline) was unilaterally injected into the MFB. A second group of mice (sham-lesioned mice,  
119 referred hereafter as control) underwent the same surgical procedure but received 1 µl vehicle  
120 injection into the MFB. To prevent dehydration, mice were monitored daily and subcutaneously  
121 injected with 1 mL lactated ringer's solution after the surgery as needed. In addition, food pellets  
122 soaked in 15% sucrose were placed on the floor of cages to facilitate eating (Francardo et al., 2011).

123

### 124 **Behavioral screening of lesion: cylinder test**

125 Two to three weeks after the MFB lesion surgery, mice were placed into a clear plastic cylinder.  
126 Mice could freely explore the cylinder, rearing and touching the cylinder wall with their forepaws.

127 The behavior during the first 3 min in the cylinder was videotaped and analyzed. The number of  
128 wall touches with the ipsilateral or contralateral forepaw was counted and used to calculate the  
129 forepaw preference. Only lesioned mice with less than 40% usage of contralateral forepaw for  
130 touching the cylinder wall were used for further experiments (Lundblad et al., 2004).

131

### 132 **Surgical procedures for implanting electrodes, infusion cannula, and electrode-cannula** 133 **assemblies**

134 2-4 weeks after the lesion surgery, 6-OHDA lesioned and control mice were anesthetized with  
135 an intraperitoneal injection of a mixture of ketamine (70 mg/kg) and dexmedetomidine (1 mg/kg)  
136 and placed on a stereotaxic apparatus. The scalp was incised to expose the skull. For electrode  
137 implantation, 1 mm craniotomies were performed above both anterior lateral motor cortices (ALM,  
138 anterior-posterior: 2.4 mm, medial-lateral:  $\pm 1.5$  mm) and two holes were drilled above visual  
139 cortex on both hemispheres for inserting ground wires (silver wire). A linear array of 16 electrodes  
140 (formvar-insulated nichrome wire, catalog no. 761000, A-M System, Sequim, WA) was bilaterally  
141 implanted into ALM (dorsal-ventral: -0.8 - -1 mm). For infusion cannula implantation, naïve mice  
142 were used instead, and a 1 mm craniotomy was performed on left ALM. A 26-gauge guide cannula  
143 with a dummy (0.5 mm projection) was inserted into ALM (dorso-ventral: -700  $\mu$ m). To record  
144 single units after local D1 receptor blockade, a group of naïve mice was unilaterally implanted in  
145 ALM with a custom-built ensemble containing 8 tetrodes (Item No. PX000004, Sandvik-Kanthal,  
146 Hallstahammar, Sweden) around an infusion guide cannula (26 gauge). Electrodes, cannulae or  
147 electrode-cannula assemblies and a head bolt (for the purpose of head restraint) were cemented to  
148 the skull with dental acrylic. Mice were allowed to recover from surgery for a week before starting  
149 water restriction regimen.

150

## 151 **Cued-licking paradigm**

152       Following recovery, mice were started on a water restriction regime, with 1.5 ml water daily  
153 one week before training. Weight was monitored and maintained at > 80% of the standard weight  
154 for age, strain and sex. In the first phase of training, mice were habituated to restraint. During brief  
155 restraint sessions, a spout containing a drop of sucrose (200 mM) was moved close to the animal  
156 to encourage licking. Once the mouse started to reliably lick the spout, session duration was  
157 increased and training in the cued-licking paradigm began. For each trial, a movable spout  
158 containing a drop of sucrose (~3  $\mu$ l, 200 mM) moved in front of the mouth of the animal 1 s after  
159 the onset of an auditory cue (200 ms, 2k Hz, 70 dB). The spout remained in place for 2 s to allow  
160 the mouse to lick and access the sucrose solution before retracting. The inter-trial interval was 10  
161 s. An infrared beam (940 nm, powered by a fiber-coupled LED, Thorlabs, Newton, NJ) was put in  
162 front of the mouth of the mouse such that each lick could be detected. Orofacial movements were  
163 also recorded with a videocamera (30 Hz frame rate) synchronized with the data acquisition  
164 software (CinePlex, Plexon, Dallas, TX).

165

## 166 **Electrophysiological recordings in control and 6-OHDA lesioned mice**

167       Multiple single units were recorded via a multichannel acquisition processor (Plexon) in mice  
168 performing the cued-licking paradigm. Neural signals were amplified, bandpass (300-8000 Hz)  
169 filtered, and digitized at 40k Hz. Single units were isolated by threshold detection and a waveform  
170 matching algorithm and were further sorted offline through principal component analysis using  
171 Offline Sorter (Plexon).

172



173 **D1/D2 receptor antagonist infusion in ALM**

174 Thirty to forty minutes before a testing session, mice previously trained in the cued-licking  
175 paradigm were briefly anesthetized with 1% isoflurane and a 33-gauge inner cannula (0.5 mm  
176 projection) was inserted into the guide cannula. 0.5  $\mu$ l of a solution of either the D1 receptor  
177 antagonist (5  $\mu$ g/ $\mu$ l SCH23390 hydrochloride, Sigma-Aldrich, St. Louis, MO), the D2 antagonist (5  
178  $\mu$ g/ $\mu$ l raclopride tartrate salt, Sigma-Aldrich) or sterile saline (0.9%) was unilaterally infused into  
179 ALM at 0.25  $\mu$ l/min using a syringe pump (11 plus, Harvard Apparatus, Holliston, MA).

180

181 **D1 receptor antagonist infusion in ALM and electrophysiological recordings**

182 After recovery from the surgery for at least a week, mice were water restricted and trained to  
183 perform the cued-licking paradigm. Testing started after 8-12 days of training. Thirty to forty  
184 minutes before a testing and electrophysiological recording session, mice were head restrained and  
185 a 33-gauge inner cannula (0.5 mm projection) was inserted into the guide cannula. 0.5  $\mu$ l of a  
186 solution of either the D1 receptor antagonist (5  $\mu$ g/ $\mu$ l SCH23390 hydrochloride, Sigma-Aldrich) or  
187 sterile saline (0.9%) were infused into ALM at 0.25  $\mu$ l/min using a syringe pump (11 plus, Harvard  
188 Apparatus). Single units were recorded and sorted offline as described above. Each session of  
189 saline infusion was followed, on the day after, by a session with D1 receptor antagonist infusion.  
190 Each mouse underwent 1-2 sessions of saline and SCH23390 infusion.

191

192 **Data analysis**

193 Data analysis was performed using Neuroexplorer (Plexon) and custom written scripts in  
194 MATLAB (MathWorks, Natick, MA).

195     *Analysis of licking behavior.* The analog trace from the infrared beam (and its breaking by the  
196 tongue) was used for analyzing licking behaviors. A licking event was detected whenever the trace  
197 crossed a fixed threshold. A bout was defined as a train of at least three consecutive licks with an  
198 inter-lick interval shorter than 500 ms (Davis and Smith, 1992). Only licking bouts within 4 s after  
199 the auditory cue were used for the analysis. In the case of two licking bouts occurred in the same  
200 trial, only the first licking bout was used for analysis. Video analysis of the oral region was used  
201 to extract the angle of tongue protrusions at each lick. Licking angle was defined as an angle  
202 between the midline of the protruded tongue and the midline of the mouse chin.

203     *Analysis of single unit.* Single unit spike timestamps were aligned to either the onset of the  
204 auditory cue or the licking bout initiation. Peri-event rasters of individual units were used to  
205 construct peristimulus time histograms (PSTHs, bin size is 100 ms). For analyzing population  
206 PSTHs, the firing rate of each neuron was normalized using area under the receiver operating  
207 characteristic curve (auROC) method (Cohen et al., 2012; Gardner and Fontanini, 2014). This  
208 method normalizes firing rate to a value between 0 and 1, in which 0.5 represents baseline firing  
209 rate, value  $> 0.5$  or  $< 0.5$  represents increased or decreased firing rate compared to the baseline,  
210 respectively. Population PSTH was calculated by averaging auROC across each unit.

211     *Analysis of cue response.* PSTHs of single units were aligned to onset of cue. Activity after  
212 onset of cue was assessed by examining firing activity in a 500 ms window after cue onset. Firing  
213 rates within each bin (bin size is 100 ms) in the 500 ms window after cue onset were compared to  
214 baseline (1 s before the auditory cue) with a Wilcoxon rank sum test ( $p < 0.05$ ) and a correction  
215 for multiple comparison (Šidák correction).

216     *Analysis of preparatory response.* PSTHs of single units were aligned to bout initiation.  
217 Activity preceding licking (i.e., preparatory activity) was assessed by examining firing rates in a

218 500 ms window before bout initiation. Firing rates within each bin (bin size is 100 ms) in the 500  
219 ms window before bout initiation were compared to baseline (1 s before the auditory cue) with a  
220 Wilcoxon rank sum test ( $p < 0.05$ ) and a correction for multiple comparison (Šidák correction).  
221 Units with significantly increased firing rate before bout initiation were defined as “excitatory  
222 preparatory” units, where units with significantly decreased firing rate before bout initiation were  
223 deemed as “inhibitory preparatory”. The latency of preparatory activity of each neuron was  
224 computed based on “change point” (CP) analysis (Jezzini et al., 2013; Liu and Fontanini, 2015;  
225 Vincis and Fontanini, 2016). To calculate latency of preparatory activity relative to the cue or bout  
226 initiation, we aligned spikes to cue onset or bout initiation and computed the cumulative  
227 distribution (CDF) of spike occurrence across all trials in the time interval starting 2 s before and  
228 ending 4 s after the cue or bout initiation, respectively. A sudden change of firing rate caused a  
229 correspondent change of the slope of CDF and the occurrence of a CP. The timing of the first  
230 significant CP was defined as the latency of preparatory activity. For analysis of latency relative  
231 the cue onset, neurons without CP (8/307) or neurons with first CP (2/307) occurring later than 3s  
232 after the cue were excluded for the analysis. For analysis of latency relative to the licking initiation,  
233 neurons without CP (6/307) or neurons with first CP (11/307) occurring after the licking initiation  
234 were excluded.

235

### 236 **Histological staining for verification of lesions and electrode/canula positioning**

237 Mice were deeply anesthetized with an intraperitoneal injection of a mixture of  
238 ketamine/dexmedetomidine at 2-3 times the anesthetic dose and were intracardially perfused with  
239 PBS followed by 4% paraformaldehyde. The brain was further fixed with 4% paraformaldehyde  
240 overnight and cryoprotected with 30% sucrose for 3 days. The brain was eventually cut with a

241 cryostat into 50  $\mu\text{m}$  or 80  $\mu\text{m}$  coronal slices. For visualizing electrode and canula tracks, 80  $\mu\text{m}$   
242 slices were stained with Hoechst 33342 (1:5000 dilution, H3570, ThermoFisher, Waltham, MA)  
243 using standard techniques. For immunostaining of tyrosine hydroxylase, 50  $\mu\text{m}$  slices were first  
244 incubated for 1 h with blocking solution (a mixture of 5% BSA, 5% normal goat serum and 0.02%  
245 Triton-X in PBS) and were then incubated overnight at 4 °C with primary antibody (rabbit anti-  
246 tyrosine hydroxylase, 1:1000 dilution, ab112, abcam, Cambridge, United Kingdom). Slices were  
247 washed with PBS, incubated for 4h at 4 °C with secondary antibody (Alexa Fluor 594 goat anti-  
248 rabbit IgG, 1:500 dilution, R37117, ThermoFisher), and finally stained with Hoechst 33342.  
249

## 250 RESULTS

251 We unilaterally injected 6-hydroxydopamine (6-OHDA) into the medial forebrain bundle  
252 (MFB) of mice to deplete dopaminergic neurons. 6-OHDA causes a unilateral depletion of  
253 dopaminergic fibers in the striatum and loss of dopaminergic neurons in ventral tegmental area  
254 (VTA) and substantia nigra pars compacta (SNc) (**Figure 1A** and **1B**) (Lundblad et al., 2004;  
255 Thiele et al., 2012). The effectiveness of the lesion was assessed by comparing the number of  
256 weight bearing wall touches between the ipsilateral and contralateral forelimbs with a cylinder test  
257 (**Figure 1C**) (Schallert et al., 2000; Lundblad et al., 2002). Lesioned mice show a lower percentage  
258 of touches with the contralateral forelimb compared to intact mice (Lundblad et al., 2004). In  
259 accordance with the literature (Lundblad et al., 2004; Lundblad et al., 2005), we screened mice  
260 with motor deficits and included them in the study only if they showed less than 40% usage of the  
261 contralateral paw compared to control (**Figure 1D**). We confirmed the loss of dopaminergic  
262 neurons and fibers with histological staining.

263

### 264 Licking deficits with dopamine depletion

265 To assess for possible deficits in licking behaviors, 6-OHDA lesioned mice ( $n = 7$ ) and vehicle  
266 injected control mice ( $n = 9$ ) were trained to lick a spout to receive a drop of sucrose 1 s after an  
267 anticipatory auditory cue (**Figure 2A**). **Figure 2B** and **2C** show raster plots of licks from control  
268 and 6-OHDA lesioned mice, respectively. We analyzed the latency and duration of licking bouts  
269 (**Figure 2D**). The latency of bout initiation was significantly longer in lesioned mice compared to  
270 controls ( $2.40 \pm 0.08$  s vs  $1.06 \pm 0.04$  s,  $t_{(14)} = 15.78$ ,  $p = 2.6 \times 10^{-10}$ ) (**Figure 2E**). The bout duration  
271 was shorter in lesioned mice relative to controls ( $1.05 \pm 0.06$  s vs  $1.70 \pm 0.062$  s,  $t_{(14)} = -7.24$ ,  $p =$   
272  $4.3 \times 10^{-6}$ ) (**Figure 2F**). The inter-lick interval, however, was not significantly affected (6-OHDA

273 lesion vs control:  $138.8 \pm 4.1$  ms vs  $144.8 \pm 4.5$  ms,  $t_{(14)} = -1$ ,  $p = 0.336$ ). In addition to the timing,  
274 we also assessed the direction of tongue movements during licking via analysis of videos of the  
275 orofacial region (**Figure 2G**). The direction of tongue movements was quantified by calculating  
276 the angle between the axis of symmetry of the tongue and the midline of the mouth (see methods).  
277 A positive angle indicated a directional bias toward the side ipsilateral to the lesion, whereas a  
278 negative angle indicated a contralateral bias. 6-OHDA lesioned mice showed a positive licking  
279 angle that was significantly different from that observed in control mice ( $27.9 \pm 5.8$  deg vs  $-0.6 \pm$   
280  $1.0$  deg, Welch's t-test,  $t_{(6)} = -4.82$ ,  $p = 0.003$  ).

281 Altogether, these results demonstrate that mice with unilateral dopamine depletion have a  
282 longer latency to initiate a lick, a shorter duration of licking bouts, and a directional bias of the  
283 tongue toward the side ipsilateral to the lesion.

284

### 285 **Changes in cue responses and preparatory activity in ALM after dopamine depletion**

286 Evidence from the literature points at the anterior lateral motor cortex (ALM) as the area  
287 responsible for modulating licking and controlling licking direction (Komiyama et al., 2010; Guo  
288 et al., 2014; Li et al., 2015; Li et al., 2016; Chen et al., 2017; Inagaki et al., 2018). To assess  
289 possible deficits in neural activity associated with dopamine depletion, we bilaterally recorded  
290 single units from ALMs of control (175 single units;  $n = 9$  mice) and 6-OHDA lesioned mice (161  
291 single units;  $n = 7$  mice) engaged in the cued-licking paradigm described above. Units recorded  
292 from both hemispheres of control mice were pooled together. Units from 6-OHDA lesioned mice  
293 were analyzed separately depending on whether they were recorded on the side ipsilateral or  
294 contralateral to the site of the 6-OHDA lesion. We focused on firing rate modulations occurring in  
295 the interval from the onset of the cue to the initiation of licking bouts. We aligned neural activity

296 either to the cue or to the bout initiation, and categorized neurons as cue responsive and/or  
297 preparatory depending on whether their firing changed shortly after the cue and/or just before  
298 licking (see methods). **Figure 3A** shows raster plots and PSTHs for two representative cue-  
299 responsive neurons from control mice: one excited and one suppressed by the auditory cue. We  
300 found that 41.7% of neurons (73 of 175 units) from control mice changed their firing rates within  
301 500 ms from the onset of the cue. Differently, only 14.3% of neurons (12 of 84 units) from the  
302 ipsilateral side, and 19.5% of neurons (15 of 77 units) from the contralateral side, of 6-OHDA  
303 lesioned mice were cue responsive (**Figure 3B**). The differences in the proportion of cue  
304 responsive neurons among these three groups were significant (Pearson's  $\chi^2$  test,  $\chi^2_{(2)} = 25.48$ ,  $p$   
305  $= 2.6 \times 10^{-6}$ ). Specifically, the proportion of cue-responsive neurons in the ipsilateral and  
306 contralateral side in 6-OHDA lesioned mice was similar (Pearson's  $\chi^2$  test,  $\chi^2_{(1)} = 0.449$ ,  
307 Bonferroni adjusted  $p = 1$ ). However, it was significantly reduced from that observed in control  
308 mice (Pearson's  $\chi^2$  test, control vs ipsilateral,  $\chi^2_{(1)} = 18.14$ , Bonferroni adjusted  $p = 6.2 \times 10^{-5}$ ;  
309 control vs contralateral,  $\chi^2_{(1)} = 10.67$ , Bonferroni adjusted  $p = 0.003$ ).

310 A large fraction of cue responsive neurons was also preparatory (90.4%, 66 of 73 units from  
311 control; 88.9%, 24 of 27 units from lesioned mice). However, not all preparatory neurons showed  
312 modulation of their activity by the onset of the cue: 52.2% (72 of 138) of the units from control  
313 and 78.9% (90 of 114) from lesioned animals did not show modulation by the cue. This difference  
314 indicates that, in a subset of neurons, preparatory activity started longer than 500 ms after the cue,  
315 thus closer to licking onset. **Figure 3C** shows raster plots and PSTHs of two representative neurons  
316 with preparatory activity recorded in control mice: the activity of one of the neurons is increased  
317 and that of the other neurons is suppressed before the initiation of a licking bout. In total, the  
318 percentage of neurons showing preparatory activity was 78.9% (138/175) in control, 66.7% (56/84)

319 in the ipsilateral side and 75.3% (58/77) in the contralateral side of 6-OHDA lesioned mice (**Figure**  
320 **3D**). Although the proportion of preparatory responses was similar across groups (Pearson's  $\chi^2$   
321 test,  $\chi^2_{(2)} = 4.50$ ,  $p = 0.105$ ), there were significant differences in the ratio of excitatory and  
322 inhibitory responses (Pearson's  $\chi^2$  test,  $\chi^2_{(2)} = 16.06$ ,  $p = 3.2 \times 10^{-4}$ ). Specifically, neurons in the  
323 ipsilateral side of 6-OHDA lesioned mice showed a significantly larger proportion of excitatory  
324 responses when compared to neurons from control mice (ipsilateral side: 67.9% [38/56] excitatory,  
325 32.1% [18/56] inhibitory; control: 38.4% [53/138] excitatory, 62.6% [85/138] inhibitory;  
326 Pearson's  $\chi^2$  test,  $\chi^2_{(1)} = 17.72$ , Bonferroni adjusted  $p = 0.001$ ), and from the contralateral side of  
327 6-OHDA lesioned mice (ipsilateral side: see above; contralateral side: 36.2% [21/58] excitatory,  
328 63.8% [37/58] inhibitory; Pearson's  $\chi^2$  test,  $\chi^2_{(1)} = 10.20$ , Bonferroni adjusted  $p = 0.004$ ).

329 Altogether, these results show that unilateral 6-OHDA lesions produce alterations in the  
330 proportion of cue responsive neurons and changes in the ratio of excitatory and inhibitory  
331 responses for preparatory activity.

332

### 333 **Slower onset of preparatory responses in ALM after dopamine depletion**

334 Given the high prevalence of preparatory responses in our experimental conditions, we further  
335 analyzed them to extract possible differences in their time course. Since preparatory activity in  
336 ALM is important for planning tongue-related movements (Guo et al., 2014; Li et al., 2015;  
337 Inagaki et al., 2018), it is reasonable to expect that the slow onset of licking observed with  
338 dopamine depletion may relate to changes in the latency of preparatory activity. **Figure 4A** and  
339 **4B** show raster plots and PSTHs of four representative neurons with preparatory responses aligned  
340 to the onset of the cue: two from control mice (**Figure 4A**, left: excitatory, right: inhibitory) and  
341 two from ipsilateral side of 6-OHDA lesioned mice (**Figure 4B**, left: excitatory, right: inhibitory).



342 **Figure 4C** and **4D** display the normalized responses (auROC, see methods) for all the preparatory  
343 neurons recorded from both hemispheres of control and lesioned mice. Visual inspection of the  
344 population activity suggests that the onset of preparatory firing may be delayed in 6-OHDA  
345 lesioned mice. This suggestion is corroborated by population PSTHs shown in **Figure 4E**. The  
346 latency of preparatory activity was directly quantified using a change point (CP) analysis approach  
347 (see methods). Response latency differed across conditions (Kruskal-Wallis Test,  $H_{(2)} = 30.68$ ,  $p$   
348  $= 2.2 \times 10^{-7}$ ). While neurons in the ipsilateral and contralateral side of 6-OHDA lesioned mice  
349 showed preparatory responses with comparable latencies ( $0.82 \pm 0.06$  s vs  $0.70 \pm 0.05$  s,  $n = 56$   
350 and 58 respectively, *post hoc* Tukey HSD test,  $p = 0.184$ ); the latency in both groups was longer  
351 than in control mice (ipsilateral side vs control:  $0.82 \pm 0.06$  s vs  $0.46 \pm 0.03$  s,  $n = 56$  and 131  
352 respectively, *post hoc* Tukey HSD test,  $p = 4.2 \times 10^{-7}$ ; contralateral side vs control,  $0.70 \pm 0.05$  s  
353 vs  $0.46 \pm 0.03$  s,  $n = 58$  and 131 respectively, *post hoc* Tukey HSD test,  $p = 0.003$ ) (**Figure 4F**  
354 and **4G**).

355 To investigate preparatory activity relative to the onset of movement, we re-aligned spikes to  
356 the initiation of a licking bout (**Figure 5A** and **5B**). Visual inspection of population PSTHs  
357 suggests a possible difference in the latency of preparatory activity relative to licking initiation  
358 (**Figure 5C**). Indeed, CP analysis revealed significant differences across conditions (Kruskal-  
359 Wallis test,  $H_{(2)} = 12.33$ ,  $p = 0.002$ ) (**Figure 5D** and **5E**). There were no significant differences in  
360 the onset of preparatory activity relative to the initiation of licking between neurons in control  
361 mice and in the contralateral side of 6-OHDA lesioned mice ( $-0.73 \pm 0.04$  s vs  $-0.75 \pm 0.07$  s,  $n =$   
362 131 and 56 respectively, *post hoc* Tukey HSD test,  $p = 1$ ). However, the onset of preparatory  
363 activity in neuron from ipsilateral ALM in 6-OHDA lesioned mice was significantly closer to the  
364 initiation of licking when compared to that in control mice ( $-0.51 \pm 0.06$  s vs  $-0.73 \pm 0.04$  s,  $n =$

365 54 and 131 respectively, *post hoc* Tukey HSD test,  $p = 0.002$ ), and contralateral ALM of 6-OHDA  
366 lesioned mice ( $-0.51 \pm 0.06$  s vs  $-0.75 \pm 0.07$  s,  $n = 54$  and  $56$  respectively, *post hoc* Tukey HSD  
367 test,  $p = 0.01$ ).

368 Altogether, neural recordings in 6-OHDA lesioned mice show that unilateral dopamine  
369 depletion induces changes in cue responsiveness and preparatory activity. There are fewer cue  
370 responsive neurons in lesioned animals. While the incidence of preparatory neurons was not  
371 affected, 6-OHDA lesions altered the balance between excitation/inhibition and delayed the timing  
372 of preparatory activity.

373

#### 374 **D1 but not D2 receptor antagonism in ALM slows licking initiation**

375 The results described above demonstrate significant alterations of neural activity in ALM  
376 following unilateral 6-OHDA lesions in the MFB. Are these changes epiphenomenal or indicative  
377 of a contribution of ALM to the licking deficits observed in 6-OHDA lesioned mice? To determine  
378 the link between dopaminergic modulation in ALM and licking deficits, we unilaterally and  
379 acutely infused D1 or D2 receptor antagonists into ALM of a new cohort of unlesioned mice (naïve)  
380 trained to perform the cued-licking paradigm. Infusion of a D1 receptor antagonist (SCH23390  
381 hydrochloride,  $5 \mu\text{g}/\mu\text{l}$ ) significantly increased the latency of bout initiation ( $1.18 \pm 0.05$  s vs  $1.47$   
382  $\pm 0.03$  s,  $n = 7$ , paired t-test,  $t_{(6)} = -6.64$ ,  $p = 5.6 \times 10^{-4}$ ) (**Figure 6A**) and reduced the duration of  
383 licking bouts ( $1.85 \pm 0.09$  s vs  $1.09 \pm 0.13$  s,  $n = 7$ , paired t-test,  $t_{(6)} = 9.62$ ,  $p = 7.2 \times 10^{-5}$ ) when  
384 compared to control, saline-infused, mice (**Figure 6B**). The licking angle, however, was not  
385 significantly affected (SCH23390 vs saline:  $3.6 \pm 0.8$  deg vs  $1.0 \pm 1.1$  deg,  $n = 7$ , paired t-test,  $t_{(6)}$   
386  $= 1.61$ ,  $p = 0.158$ ) (**Figure 6C**). Differently, ALM infusion of a D2 antagonist (raclopride tartrate  
387 salt,  $5 \mu\text{g}/\mu\text{l}$ ) did not significantly affect the latency of bout initiation (raclopride vs saline:  $1.16 \pm$

388 0.05 s vs  $1.15 \pm 0.04$  s,  $n = 9$ , paired t-test,  $t_{(8)} = 0.20$ ,  $p = 0.85$ ) (**Figure 6D**), licking bout duration  
389 (raclopride vs saline:  $1.66 \pm 0.11$  s vs  $1.65 \pm 0.08$  s,  $n = 9$ , paired t-test,  $t_{(8)} = 0.09$ ,  $p = 0.93$ ) (**Figure**  
390 **6E**) or licking angle (raclopride vs saline:  $0.1 \pm 0.8$  deg vs  $0.5 \pm 1.1$  deg,  $n = 6$ , paired t-test,  $t_{(8)} =$   
391  $0.55$ ,  $p = 0.60$ ) (**Figure 6F**).

392 These data demonstrate that acute, unilateral blockade of D1, but not D2, dopaminergic  
393 signaling in ALM of naïve mice reproduces the behavioral impairments in licking initiation and  
394 duration observed in 6-OHDA lesioned mice, but not the ipsilateral bias in licking direction.

395

### 396 **Blockade of dopamine D1 receptor in ALM affects cue responses and preparatory activity**

397 To identify the neural correlates of licking deficits observed after acute, local D1 receptor  
398 blockade, we infused SCH23390 (or saline) unilaterally into ALM of mice performing the cued-  
399 licking paradigm, and recorded single unit activity from the same side of the cortex. Unilateral  
400 infusion of D1 receptor antagonist significantly reduced the proportion of cue responsive neurons  
401 compared to saline infusions (SCH23390: 11.4% [5/44]; saline: 34.3% [12/35]; Pearson's  $\chi^2$  test,  
402  $\chi^2_{(1)} = 4.78$ ,  $p = 0.029$ ) (**Figure 7A**). Infusion of SCH23390 did not change the overall prevalence  
403 of neurons with preparatory activity (SCH23390: 72.7% [32/44], saline: 65.7% [23/35], Pearson's  
404  $\chi^2$  test, proportion:  $\chi^2_{(1)} = 0.182$ ,  $p = 0.669$ ), nor the relative proportion of excitatory and inhibitory  
405 response compared to control (SCH23390: 56.2% [18/32] excitatory, 43.8% [14/32] inhibitory;  
406 saline: 47.8% [11/23] excitatory, 52.2% [12/23] inhibitory; Pearson's  $\chi^2$  test, proportion:  $\chi^2_{(1)} =$   
407  $0.12$ ,  $p = 0.731$ ) (**Figure 7B** and **7C**). D1 receptors blockade did, however, affect the latency of  
408 preparatory activity, as suggested by visual inspection of population PSTHs (**Figure 7C, 7D** and  
409 **7G**). Quantification of the latency of preparatory activity relative to the cue revealed that D1  
410 receptor antagonist infusion in ALM delayed its onset compared to control infusions ( $0.8 \pm 0.09$  s

411 vs  $0.44 \pm 0.06$  s,  $n = 21$  and  $31$  respectively, Wilcoxon rank-sum test,  $W = 414$ ,  $p = 0.008$ ) (**Figure**  
412 **7E and 7F**). To compare the timing of preparatory activity relative to the onset of movement, we  
413 re-aligned spikes to the initiation of a licking bout. SCH23390 moved the onset of preparatory  
414 spiking closer to the initiation of licking compared to control ( $-0.52 \pm 0.08$  s vs  $-0.77 \pm 0.10$  s,  $n =$   
415  $20$  and  $29$  respectively, Wilcoxon rank-sum test,  $W = 403$ ,  $P = 0.0496$ ) (**Figure 7H and 7I**).

416 Altogether, these results show that acute intra-ALM infusion of a D1 receptor antagonist not  
417 only reproduces the slower licking initiation, but also recapitulates the reduction of cue responsive  
418 neurons and the slower onset of preparatory activity observed in 6-OHDA lesioned mice.  
419 Interestingly, neither lateral deviation of the tongue, nor changes in the proportion of excitatory  
420 and inhibitory responses were observed in animals infused with the antagonist.

421

## 422 **DISCUSSION**

423 The results presented here provide behavioral, pharmacological and electrophysiological  
424 evidence showing a link between dopaminergic transmission in ALM, dysfunction of ALM neural  
425 activity and licking deficits. 6-OHDA lesioned mice trained to perform a cued-licking task showed  
426 delayed licking initiation, shorter duration of licking bouts and deviated tongue protrusion  
427 compared to controls. Single unit recordings revealed that unilateral dopamine depletion affects  
428 neural activity in ALM in several ways. First, it reduces the number of neurons activated by an  
429 anticipatory cue. Second, it changes the ratio between excitatory and inhibitory preparatory  
430 activity preceding movement, leading to more excitatory and fewer inhibitory modulations in the  
431 lesioned hemisphere of 6-OHDA lesioned mice. Finally, unilateral dopamine depletion results in  
432 delayed preparatory activity compared to controls. To determine whether disruption of cortical  
433 dopaminergic modulation directly caused licking deficits, we locally infused D1 or D2 receptor

434 antagonists in ALM of unlesioned mice. Acutely antagonizing D1 receptors in ALM produced  
435 delayed licking initiation and shorter licking bouts. Single unit recordings after intra-ALM D1  
436 blockade demonstrated that the behavioral deficits were associated with a reduction in the  
437 prevalence of cue responsive neurons and a delay in preparatory activity. Neither the lateral  
438 deviation of the tongue, nor the changes in the proportion of excitatory and inhibitory preparatory  
439 responses were reproduced by the infusion. Altogether, our data show a direct relationship between  
440 D1 receptor dopaminergic signaling in ALM, cue-evoked and preparatory firing and deficits in  
441 licking. More generally, these results suggest that cortical dopaminergic transmission may play a  
442 role in the genesis of some of the key symptoms of PD.

443

#### 444 **Licking behavior after dopamine depletion**

445 Patients with PD suffer from orolingual dysfunction, including tongue tremor and tongue  
446 weakness. Previous studies aimed at understanding how dopamine depletion affects tongue  
447 movement showed that unilateral 6-OHDA lesion of the MFB in rats significantly reduced tongue  
448 force and slightly increased the duration of pressing time during a tongue pressing test (Ciucci et  
449 al., 2011; Nuckolls et al., 2012). However, these experiments relied on a complex task in which  
450 rats were trained to press a disk with their tongue, and did not investigate natural licking or its  
451 latency of onset. Here, we studied tongue movements in the context of simple cued-licking  
452 paradigm. 6-OHDA lesioned mice displayed slower licking initiation, shorter bout duration (i.e.  
453 fewer licks per bout) and deviated tongue protrusion. The lesion did not affect inter-licking interval,  
454 demonstrating that the speed of each lick was not an issue in our animals.

455 These motor deficits could reflect an inability to control movement initiation, execution and  
456 termination. It is possible that some of the deficits observed in our task may be secondary to

457 impairments in learning (Wise, 2004). For instance, delayed licking could derive from a reduced  
458 ability to associate a predictive cue with a reward. According to this view, longer latency to initiate  
459 movement would emerge from a weaker associative strength of the anticipatory signal or from the  
460 lack of anticipatory dopaminergic signaling. While we do not exclude underlying learning deficits  
461 in 6-OHDA lesioned mice, the results from acute unilateral infusions of D1 receptor antagonists  
462 in ALM emphasize the importance of real-time dopaminergic activity in the cortex in initiating  
463 movement.

464 ALM is known to regulate the direction of movement. Unilateral silencing of ALM activity,  
465 either with pharmacological or optogenetic approaches, causes deviation of the tongue on the  
466 ipsilateral side (Li et al., 2015). However, our local pharmacological manipulations demonstrate  
467 that this effect cannot be produced by acute, unilateral intra-ALM impairments in dopaminergic  
468 transmission. Hence, tongue deviation in 6-OHDA lesioned mice may result either from the effects  
469 of chronic unilateral disruption of ALM dopaminergic transmission, or by deficits that initiate in  
470 other nodes of the cortico-striatal loop (Von Voigtlander and Moore, 1973).

471 Altogether, our experiments establish active licking in mice as a model for studying motor  
472 deficits in the context of dopamine depletion, and point to the importance of D1 receptor signaling  
473 in ALM for mediating initiation and termination of tongue movements.

474

#### 475 **Motor cortex and Parkinson's Disease**

476 Motor cortical activity is abnormal in PD patients and in animal models of PD (Lindenbach and  
477 Bishop, 2013). Changes in general excitability, excitation/inhibition balance, and timing have been  
478 described in the motor cortex during movement preparation or execution (Escola et al., 2003;

479 Lindenbach and Bishop, 2013; Pasquereau et al., 2015). Our results on ALM fit with the existing  
480 literature and significantly extend it.

481 We showed that unilateral 6-OHDA lesion of the medial forebrain bundle impacts activity in  
482 the ALM. There was a significant reduction in the proportion of neurons whose firing rates showed  
483 modulation by the cue predicting the arrival of the spout. This result is consistent with the  
484 hypothesis of hypo-activation of motor cortex in PD and with recordings from MPTP-treated  
485 monkeys showing fewer cue responsive neurons in lesioned animals compared to controls (Escola  
486 et al., 2003). Although the total number of neurons changing their firing rates just before licking  
487 (i.e., preparatory neurons) was not affected by unilateral 6-OHDA lesion, we observed alterations  
488 in the ratio of excitatory and inhibitory modulations. Changes in excitation and inhibition were  
489 described in motor cortices of PD patients using paired-pulse transcranial magnetic stimulation  
490 (Lefaucheur, 2005; Lindenbach and Bishop, 2013). Our comparison of excitatory and inhibitory  
491 preparatory activity revealed a reduction in the proportion of neurons inhibited and an increase in  
492 the proportion of neurons excited prior to movement, a result consistent with the decrease of  
493 GABAergic tone observed in PD patient (Ridding et al., 1995). Finally, in addition to the changes  
494 described above, we observed deficits in the timing of preparatory activity. Preparatory activity in  
495 6-OHDA lesioned mice had a longer latency from the cue compared to control mice, consistent  
496 with the delayed onset of the licking initiation observed after 6-OHDA lesion. Unilateral dopamine  
497 depletion affected the timing of preparatory activity also when spiking was aligned to the onset of  
498 licking. These changes in timing of neural activity were also observed in primate models of PD  
499 and in human PD patients (Doudet et al., 1990; Pasquereau et al., 2015). Specifically, in a reaction  
500 time task, PD patients showed a longer latency in initiating movement paralleled by a slower  
501 buildup of neuronal activation over the motor cortex (Dick et al., 1989; Mazzoni et al., 2012).

502 The results from acute D1 receptor blockade experiments provide very important information  
503 regarding the relationship between firing abnormalities in the cortex and licking deficits. They  
504 demonstrate that the reduction of cue responsive neurons and the delaying of preparatory activity  
505 in ALM can be sufficient to generate changes in motor systems leading to delayed licking.  
506 Furthermore, the lack of changes in balance between excitatory and inhibitory preparatory activity  
507 is evidence that this abnormality has limited causal role with regard to licking timing, and perhaps  
508 is more involved in tongue deviation (a symptom not present after local manipulations of ALM).

509 Altogether, our results show changes in ALM activity consistent with those described in PD  
510 patients and validate the study of ALM control of licking as a model for understanding the cortical  
511 involvement in PD.

512

### 513 **Dopaminergic modulation of cortical activity**

514 Motor cortices receive direct dopaminergic innervation from the midbrain and dopaminergic  
515 inputs are known to play an important role in cortical plasticity and motor skill learning (Gaspar  
516 et al., 1991; Molina-Luna et al., 2009; Hosp et al., 2011; Guo et al., 2015). Dopamine exerts its  
517 function through five different receptors which are grouped into D1-like and D2-like receptors  
518 (Jaber et al., 1996). While both D1 and D2 receptors in motor cortex are important for modulating  
519 cortical plasticity and motor skill learning (Molina-Luna et al., 2009; Guo et al., 2015), here we  
520 show that dopaminergic signaling via D1, but not D2, receptors in ALM is required for modulating  
521 licking initiation and maintenance. This discrepancy may reflect the multiple functions of  
522 dopaminergic modulation in cortex. Our results indicate that acute D1 receptor signaling in ALM  
523 plays a role in modulating licking initiation and the timing of preparatory activity. This suggestion  
524 is consistent with recent findings showing transient activation of dopaminergic neurons before



525 self-paced movement initiation (Jin and Costa, 2010; Howe and Dombeck, 2016; da Silva et al.,  
526 2018) and with experiments showing that optogenetic manipulation of transient dopaminergic  
527 activity can causally affect movement initiation (da Silva et al., 2018). In addition, our results on  
528 D1 receptor modulation of licking initiation dovetail nicely with existing literature in primates  
529 (Sawaguchi, 1995) and with data showing the importance of D1, but not D2, dopaminergic  
530 signaling in prefrontal cortex for the temporal control of action (Narayanan et al., 2012).

531 Our experiments clearly point at ALM D1 receptors as important in licking initiation and in  
532 modulating cue responses and preparatory firing in ALM. How activation of D1 receptors  
533 contribute to the patterns of activity observed in the ALM of mice performing a cued-licking  
534 paradigm remains to be seen and will be the subject of future investigations.

535

536 **REFERENCE**

537

538 Chen T-WW, Li N, Daie K, Svoboda K (2017) A Map of Anticipatory Activity in Mouse Motor  
539 Cortex. *Neuron* 94:866-8790000.

540 Ciucci MR, Russell JA, Schaser AJ, Doll EJ, Vinney LM, Connor NP (2011) Tongue force and  
541 timing deficits in a rat model of Parkinson disease. *Behavioural Brain Research* 222:315-  
542 320.

543 Cohen JY, Haesler S, Vong L, Lowell BB, Uchida N (2012) Neuron-type-specific signals for  
544 reward and punishment in the ventral tegmental area. *Nature* 482:85-88.

545 da Silva J, Tecuapetla F, Paixão V, Costa RM (2018) Dopamine neuron activity before action  
546 initiation gates and invigorates future movements. *Nature* 554:244.

547 Davis JD, Smith GP (1992) Analysis of the microstructure of the rhythmic tongue movements of  
548 rats ingesting maltose and sucrose solutions. *Behavioral neuroscience* 106:217-228.

549 Dick JP, Rothwell JC, Day BL, Cantello R, Buruma O, Gioux M, Benecke R, Berardelli A,  
550 Thompson PD, Marsden CD (1989) The Bereitschaftspotential is abnormal in Parkinson's  
551 disease. *Brain : a journal of neurology* 112 ( Pt 1):233-244.

552 Doudet DJ, Gross C, Arluison M, Bioulac B (1990) Modifications of precentral cortex discharge  
553 and EMG activity in monkeys with MPTP-induced lesions of DA nigral neurons.  
554 *Experimental Brain Research* 80:177-188.

555 Escola L, Michelet T, Macia F, Guehl D, Bioulac B, Burbaud P (2003) Disruption of information  
556 processing in the supplementary motor area of the MPTP-treated monkey A clue to the  
557 pathophysiology of akinesia? *Brain* 126:95-114.

558 Francardo V, Recchia A, Popovic N, Andersson D, Nissbrandt H, Cenci MA (2011) Impact of the  
559 lesion procedure on the profiles of motor impairment and molecular responsiveness to L-  
560 DOPA in the 6-hydroxydopamine mouse model of Parkinson's disease. *Neurobiol Dis*  
561 42:327-340.

562 Gardner M, Fontanini A (2014) Encoding and Tracking of Outcome-Specific Expectancy in the  
563 Gustatory Cortex of Alert Rats. *The Journal of Neuroscience* 34:13000-13017.

564 Gaspar P, Duyckaerts C, Alvarez C, Javoy-Agid F, Berger B (1991) Alterations of dopaminergic  
565 and noradrenergic innervations in motor cortex in Parkinson's disease. *Annals of neurology*  
566 30:365-374.

567 Goldberg JA, Boraud T, Maraton S, Haber SN, Vaadia E, Bergman H (2002) Enhanced synchrony  
568 among primary motor cortex neurons in the 1-methyl-4-phenyl-1,2,3,6-tetrahydropyridine  
569 primate model of Parkinson's disease. *The Journal of neuroscience : the official journal of*  
570 *the Society for Neuroscience* 22:4639-4653.

571 Guo L, Xiong H, Kim J-I, Wu Y-W, Lalchandani RR, Cui Y, Shu Y, Xu T, Ding JB (2015)  
572 Dynamic rewiring of neural circuits in the motor cortex in mouse models of Parkinson's  
573 disease. *Nature Neuroscience* 18:1299-1309.

574 Guo ZV, Li N, Huber D, Ophir E, Gutnisky D, Ting JT, Feng G, Svoboda K (2014) Flow of  
575 Cortical Activity Underlying a Tactile Decision in Mice. *Neuron* 81:179-194.

- 576 Hosp JA, Pekanovic A, Rioult-Pedotti MS, Luft AR (2011) Dopaminergic Projections from  
577 Midbrain to Primary Motor Cortex Mediate Motor Skill Learning. *The Journal of*  
578 *Neuroscience* 31:2481-2487.
- 579 Howe MW, Dombeck DA (2016) Rapid signalling in distinct dopaminergic axons during  
580 locomotion and reward. *Nature* 535:505-510.
- 581 Inagaki HK, Inagaki M, Romani S, Svoboda K (2018) Low-dimensional and monotonic  
582 preparatory activity in mouse anterior lateral motor cortex. *The Journal of*  
583 *Neuroscience*:3152-3117.
- 584 Jaber M, Robinson SW, Missale C, Caron MG (1996) Dopamine receptors and brain function.  
585 *Neuropharmacology* 35:1503-1519.
- 586 Jagmag SA, Tripathi N, Shukla SD, Maiti S, Khurana S (2016) Evaluation of Models of  
587 Parkinson's Disease. *Frontiers in Neuroscience* 9:503.
- 588 Jezzini A, Mazzucato L, Camera G, Fontanini A (2013) Processing of Hedonic and Chemosensory  
589 Features of Taste in Medial Prefrontal and Insular Networks. *The Journal of Neuroscience*  
590 33:18966-18978.
- 591 Jin X, Costa RM (2010) Start/stop signals emerge in nigrostriatal circuits during sequence learning.  
592 *Nature* 466:457-462.
- 593 Komiyama T, Sato TR, O'Connor DH, Zhang Y-X, Huber D, Hooks BM, Gabbito M, Svoboda K  
594 (2010) Learning-related fine-scale specificity imaged in motor cortex circuits of behaving  
595 mice. *Nature* 464:1182-1186.
- 596 Lefaucheur J-P (2005) Motor cortex dysfunction revealed by cortical excitability studies in  
597 Parkinson's disease: influence of antiparkinsonian treatment and cortical stimulation.  
598 *Clinical Neurophysiology* 116:244-253.
- 599 Li N, Daie K, Svoboda K, Druckmann S (2016) Robust neuronal dynamics in premotor cortex  
600 during motor planning. *Nature* 532.
- 601 Li N, Chen T-W, Guo ZV, Gerfen CR, Svoboda K (2015) A motor cortex circuit for motor  
602 planning and movement. *Nature* 519:51-56.
- 603 Lindenbach D, Bishop C (2013) Critical involvement of the motor cortex in the pathophysiology  
604 and treatment of Parkinson's disease. *Neuroscience & Biobehavioral Reviews* 37:2737-  
605 2750.
- 606 Liu H, Fontanini A (2015) State Dependency of Chemosensory Coding in the Gustatory Thalamus  
607 (VPMpc) of Alert Rats. *The Journal of Neuroscience* 35:15479-15491.
- 608 Lundblad M, Picconi B, Lindgren H, Cenci MA (2004) A model of l-DOPA-induced dyskinesia  
609 in 6-hydroxydopamine lesioned mice: relation to motor and cellular parameters of  
610 nigrostriatal function. *Neurobiology of Disease* 16.
- 611 Lundblad M, Andersson M, Winkler C, Kirik D, Wierup N, Cenci MA (2002) Pharmacological  
612 validation of behavioural measures of akinesia and dyskinesia in a rat model of Parkinson's  
613 disease. *European Journal of Neuroscience* 15:120-132.

- 614 Lundblad M, Usiello A, Carta M, Håkansson K, Fisone G, Cenci MA (2005) Pharmacological  
615 validation of a mouse model of l-DOPA-induced dyskinesia. *Experimental Neurology*  
616 194:66-75.
- 617 Mazzoni P, Shabbott B, Cortés J (2012) Motor Control Abnormalities in Parkinson's Disease.  
618 Cold Spring Harbor Perspectives in Medicine 2.
- 619 Molina-Luna K, Pekanovic A, Röhrich S, Hertler B, Schubring-Giese M, Rioult-Pedotti M-S, Luft  
620 AR (2009) Dopamine in Motor Cortex Is Necessary for Skill Learning and Synaptic  
621 Plasticity. *PLoS ONE* 4.
- 622 Narayanan NS, Land BB, Solder JE, Deisseroth K, DiLeone RJ (2012) Prefrontal D1 dopamine  
623 signaling is required for temporal control. *Proceedings of the National Academy of*  
624 *Sciences* 109:20726-20731.
- 625 Nuckolls AL, Worley C, Leto C, Zhang H, Morris JK, Stanford JA (2012) Tongue force and tongue  
626 motility are differently affected by unilateral vs bilateral nigrostriatal dopamine depletion  
627 in rats. *Behavioural brain research* 234:343-348.
- 628 Pasquereau B, Turner RS (2011) Primary motor cortex of the parkinsonian monkey: differential  
629 effects on the spontaneous activity of pyramidal tract-type neurons. Primary motor cortex  
630 of the parkinsonian monkey: differential effects on the spontaneous activity of pyramidal  
631 tract-type neurons.
- 632 Pasquereau B, DeLong MR, Brain TRS (2015) Primary motor cortex of the parkinsonian monkey:  
633 altered encoding of active movement. Primary motor cortex of the parkinsonian monkey:  
634 altered encoding of active movement.
- 635 Ridding MC, Inzelberg R, Rothwell JC (1995) Changes in excitability of motor cortical circuitry  
636 in patients with Parkinson's disease. *Annals of neurology* 37:181-188.
- 637 Sawaguchi T. (1995) The Role of Dopamine in Frontal Motor Cortical Functions of Monkeys. In:  
638 Kimura M., Graybiel A.M. (eds) *Functions of the Cortico-Basal Ganglia Loop*. Springer,  
639 Tokyo
- 640 Schallert T, Fleming, Leasure JL, Tillerson JL, Bland ST (2000) CNS plasticity and assessment of  
641 forelimb sensorimotor outcome in unilateral rat models of stroke, cortical ablation,  
642 parkinsonism and spinal cord injury. *Neuropharmacology* 39:777-787.
- 643 Thiele SL, Warre R, Nash JE (2012) Development of a Unilaterally-lesioned 6-OHDA Mouse  
644 Model of Parkinson's Disease. *Journal of Visualized Experiments*.
- 645 Travers JB, Dinardo LA, Karimnamazi H (1997) Motor and premotor mechanisms of licking.  
646 *Neuroscience and biobehavioral reviews* 21:631-647.
- 647 Vincis R, Fontanini A (2016) Associative learning changes cross-modal representations in the  
648 gustatory cortex. *eLife* 5.
- 649 Von Voigtlander PF, Moore KE (1973) Turning behavior of mice with unilateral 6-  
650 hydroxydopamine lesions in the striatum: effects of apomorphine, L-DOPA, amantadine,  
651 amphetamine and other psychomotor stimulants. *Neuropharmacology* 12:451-462.
- 652 Wise RA (2004) Dopamine, learning and motivation. *Nature Reviews Neuroscience* 5.  
653

654 **FIGURE LEGEND**

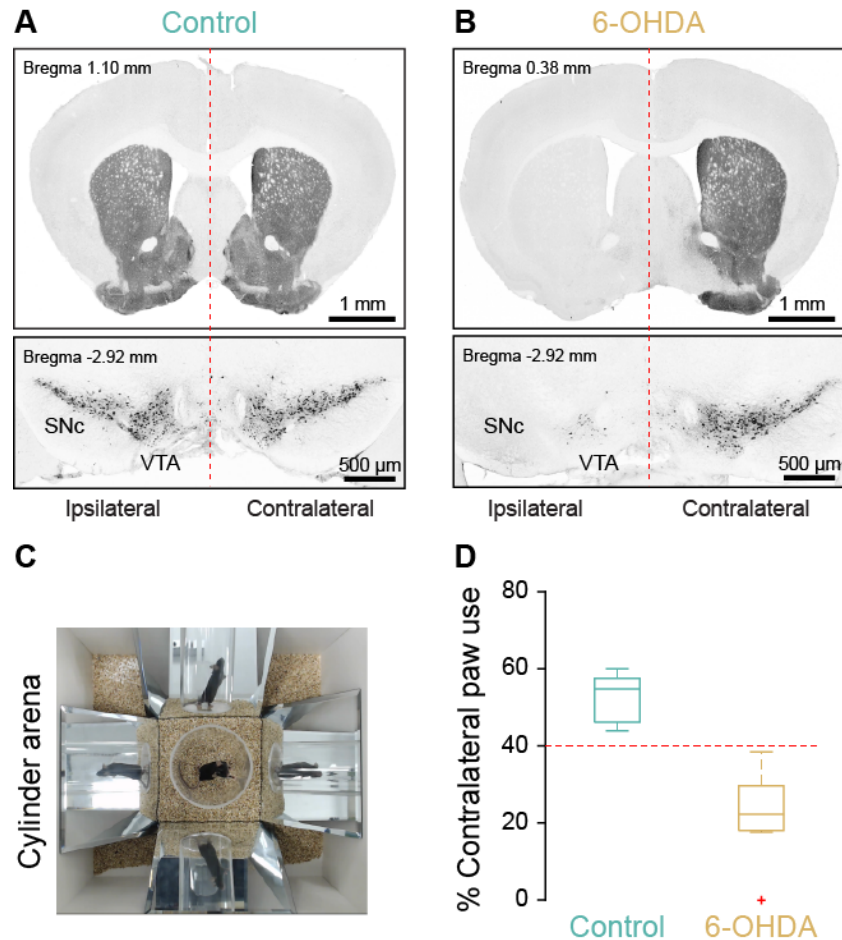

655

656 **Figure 1.** Confirmation of lesion and motor deficits after unilateral 6-OHDA injections in MFB.

657 **A and B,** Representative tyrosine hydroxylase (TH) immunofluorescence staining showing

658 dopaminergic fibers in striatum (top panel) and dopaminergic neurons in SNc and VTA (bottom

659 panel) in a control mouse (**A**) and in a 6-OHDA lesioned mouse (**B**). Vertical dashed red lines

660 indicate the midline of the brain. **C,** A representative snapshot of a unilateral 6-OHDA lesioned

661 mouse performing the cylinder test. **D,** Boxplots of percentage of contralateral paw usage during

662 the cylinder test in control (n = 9, blue) and screened 6-OHDA lesioned mice (n = 7, brown).

663

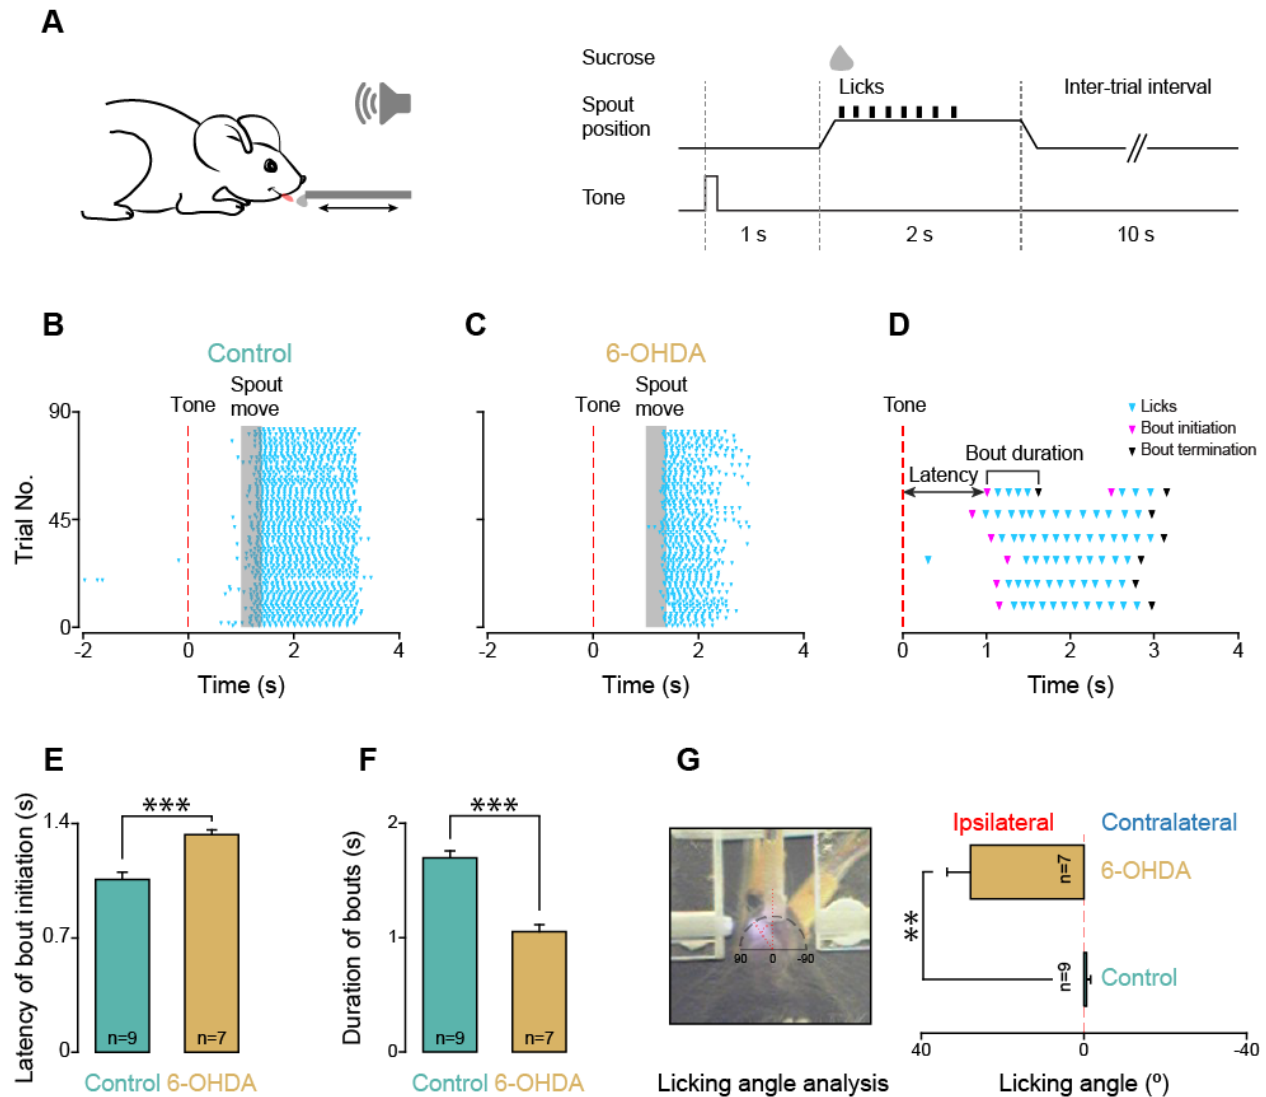

664

665 **Figure 2.** Licking deficits in 6-OHDA lesioned mice. **A**, *Left panel*: sketch showing a head-fixed

666 mouse licking a spout to obtain sucrose. *Right panel*: schematic diagram of the experimental design

667 for each trial. **B and C**, Representative raster plots of licking recorded from a control mouse (**B**)

668 and a unilateral 6-OHDA lesioned (**C**) mouse performing the cued-licking paradigm. Dashed red

669 vertical lines (time 0) indicate the onset of the auditory cue. Cyan triangles represent each

670 individual lick. The gray shaded area highlights the movement of the spout. **D**, Representative

671 raster plot of licking demonstrating bout analysis. A licking bout is defined as a train of at least

672 three consecutive licks with an inter-lick interval shorter than 500 ms. Latency of bout initiation

673 is defined as the latency of the first lick of a licking bout after tone onset. Cyan triangles represent  
674 each individual lick. Magenta triangles highlight the first lick of a licking bout (bout initiation)  
675 and black triangles highlight the last lick of a licking bout. **E and F**, Average values of latency of  
676 bout initiation (**E**) and duration of licking bouts (**F**) in control (n = 9 mice, blue) and 6-OHDA  
677 lesioned (n = 7 mice, brown) mice (**E and F**, t-test, \*\*\*  $p < 0.001$ ). Error bars represent SEM. **G**,  
678 *Left panel*, a presentative snapshot showing a 6-OHDA lesioned mouse extending the tongue  
679 towards the licking spout. Note that the tongue protrudes on the right compared to the midline of  
680 the chin; *Right panel*: average values of the angles of tongue protrusion during licking in control  
681 (n = 9 mice, blue) and 6-OHDA lesioned (n = 7 mice, brown) mice (Welch's corrected t-test, \*\* $p$   
682  $< 0.01$ ). Error bars represent SEM.  
683

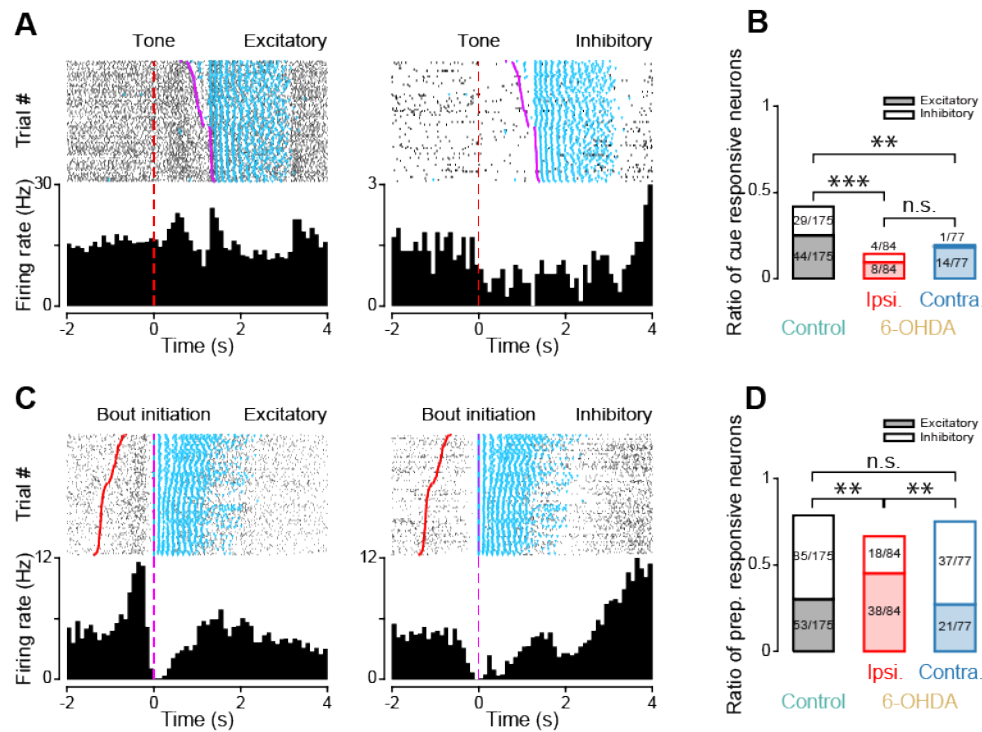

684

685 **Figure 3.** Cue responses and preparatory activity in ALM. **A**, Raster plots and PSTHs of neural  
686 activity recorded from two representative ALM neurons modulated by the cue within 500 ms from  
687 its onset. Dashed red vertical lines (time 0) indicate the onset of the auditory cue. Cyan markers  
688 represent each individual lick. Magenta markers represent the onset of each licking bout. Black  
689 ticks in raster plots represent individual action potentials. **B**, Proportion of cue responsive neurons  
690 in control mice (black) as well as ipsilateral (red) and contralateral (blue) sides of 6-OHDA  
691 lesioned mice (*post hoc* pairwise Pearson's  $\chi^2$  test for overall proportion of cue responsive neurons  
692 with Bonferroni correction, \*\*\*  $p < 0.001$ , \*\*  $p < 0.01$ , n.s. indicates not significant). **C**, Raster plots  
693 and PSTHs of neural activity recorded from two other ALM neurons modulated within 500 ms  
694 before licking bout initiation. Dashed magenta vertical lines (time 0) indicate the onset of the bout  
695 initiation. Cyan markers represent each individual lick. Red markers represent the onset of the cue.  
696 Black ticks in raster plots represent each action potential. **D**, Proportion of preparatory responsive  
697 neurons (filled: excitatory responses; empty: inhibitory responses) in control mice (black) as well



698 as ipsilateral (red) and contralateral (blue) sides of 6-OHDA lesioned mice (*post hoc* pairwise  
699 Pearson's  $\chi^2$  test for excitation-inhibition ratio of preparatory responses with Bonferroni correction,  
700 \*\*  $p < 0.01$ , n.s. indicates not significant).

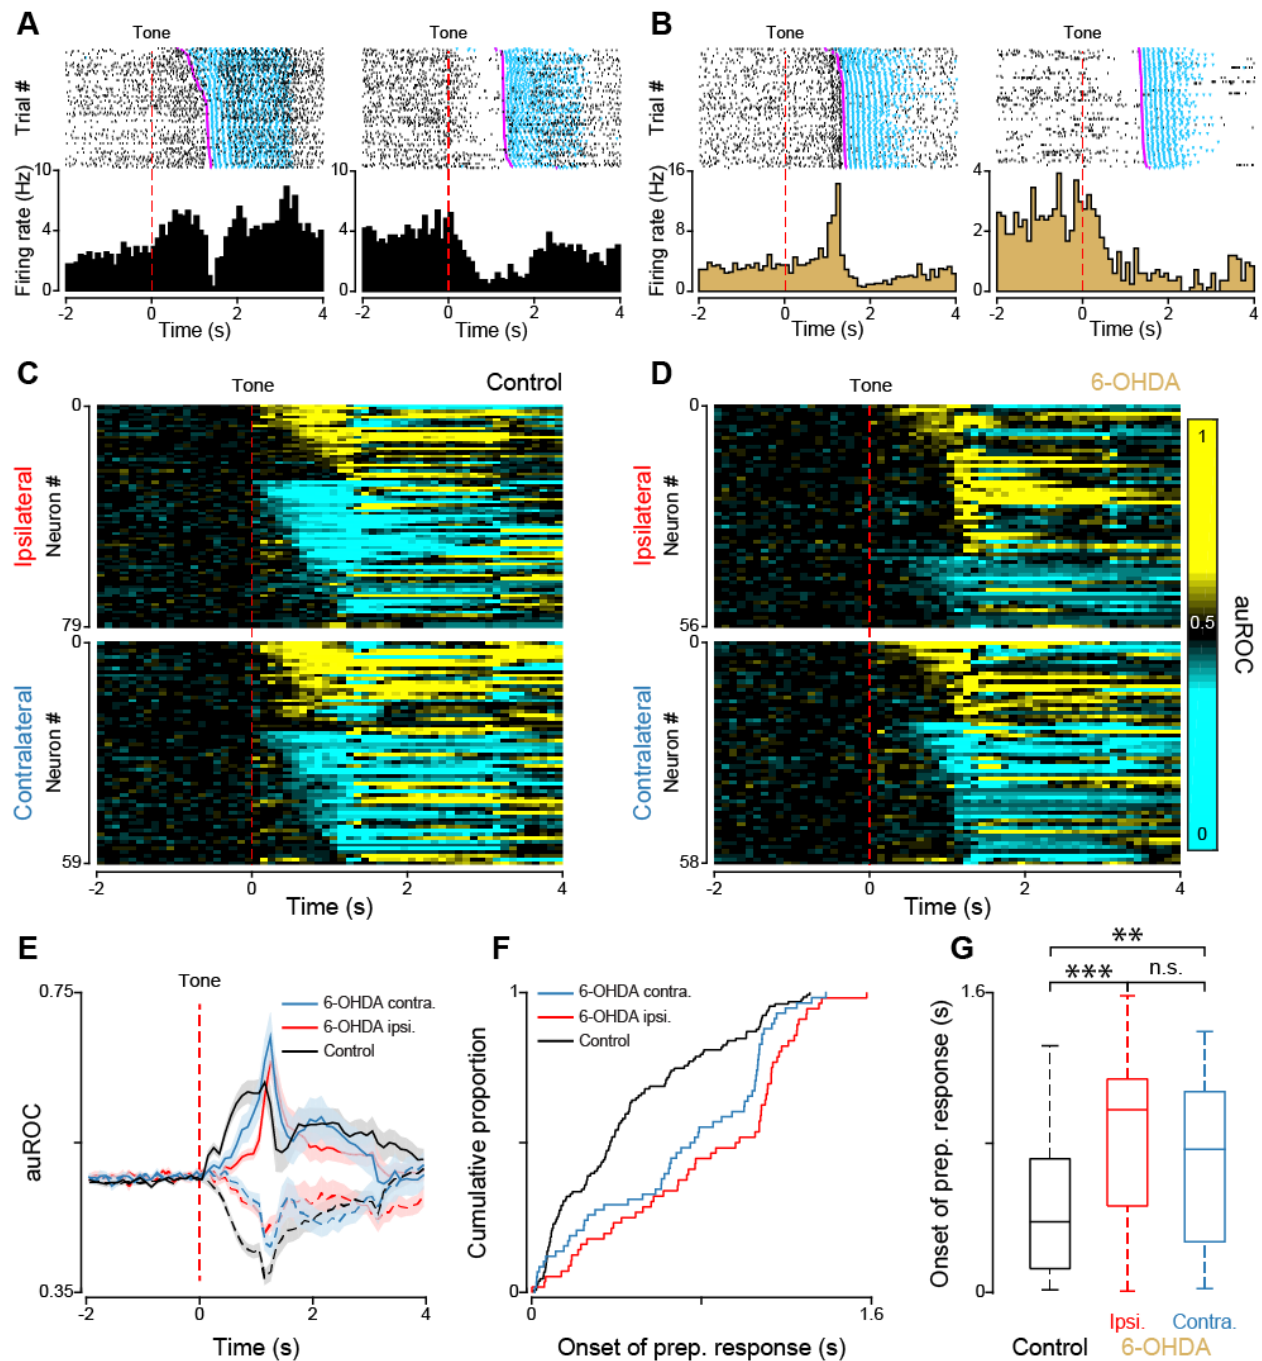

701

702 **Figure 4.** Timing of preparatory activity relative to the onset of the cue in control and 6-OHDA

703 lesioned mice. **A and B**, Raster plots and PSTHs of neural activity recorded from four ALM

704 neurons showing representative excitatory and inhibitory preparatory activity recorded from

705 control (A) and 6-OHDA lesioned mice (B). Dashed red vertical lines (time 0) indicate the onset

706 of the auditory cue. Cyan markers represent each individual lick. Magenta markers represent the

707 onset of each licking bout. Black vertical ticks in raster plots represent action potentials. **C and D**,  
708 Population plots of all ALM neurons recorded from ipsilateral and contralateral sides in control  
709 (**C**) and 6-OHDA lesioned (**D**) mice. Each row represents a neuron and the color of each square  
710 along the x axis represents the normalized (auROC) firing rate within each 100 ms bin. Dashed  
711 red vertical lines (time 0) indicate the onset of the auditory cue. **E**, Population PSTHs of excitatory  
712 and inhibitory preparatory responses from control mice (black; data from ipsilateral and  
713 contralateral ALM were pulled together), ipsilateral (red) and contralateral (blue) sides of 6-  
714 OHDA lesioned mice. The dashed red vertical line (time 0) indicates the onset of the auditory cue.  
715 The shadow area around each curve represents the corresponding SEM. **F and G**, Cumulative  
716 distributions (**F**) and boxplots (**G**) for the latency of preparatory activity relative to the cue onset  
717 in control (black), ipsilateral (red) and contralateral (blue) sides of 6-OHDA lesioned mice  
718 (Kruskal-Wallis test, post hoc Tukey HSD test, \*\*  $p < 0.01$ , \*\*\*  $p < 0.001$ , n.s. indicates not  
719 significant).  
720

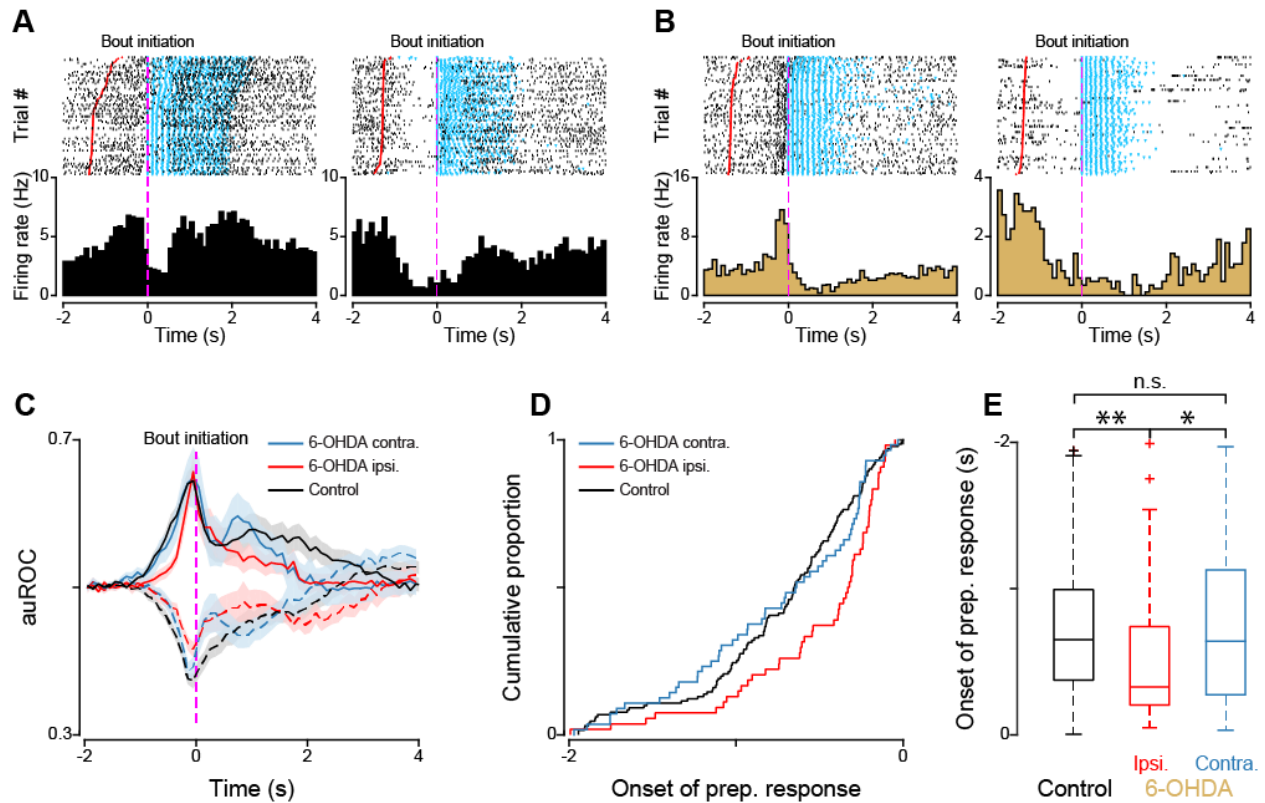

721

722 **Figure 5.** Timing of preparatory activity relative to the onset of a licking bout in control and 6-

723 OHDA lesioned mice. **A and B**, Raster plots and PSTHs of the same ALM neurons shown in Fig.

724 **4A and 4B**, but re-aligned to licking bout initiation. Dashed magenta vertical lines (time 0) indicate

725 the bout initiation, red markers indicate the onset of the auditory cue, cyan markers represent each

726 individual lick. Black ticks in the raster plots represent individual action potential. **C**, Population

727 PSTHs of excitatory and inhibitory preparatory responses recorded from ALM neurons of control

728 mice (black), ipsilateral (red) and contralateral (blue) sides of 6-OHDA lesioned mice. The dashed

729 magenta vertical line (time 0) indicates the initiation of licking bouts. The shadow area around

730 each curve represents the corresponding SEM. **D and E**, Cumulative distributions (**D**) and boxplots

731 (**E**) for the latency of preparatory activity relative to the bout initiation in control (black), ipsilateral

732 (red) and contralateral (blue) sides of 6-OHDA lesioned mice (Kruskal-Wallis test, post hoc Tukey

733 HSD test, \* p < 0.05, \*\* p < 0.01, n.s. indicates not significant).

734

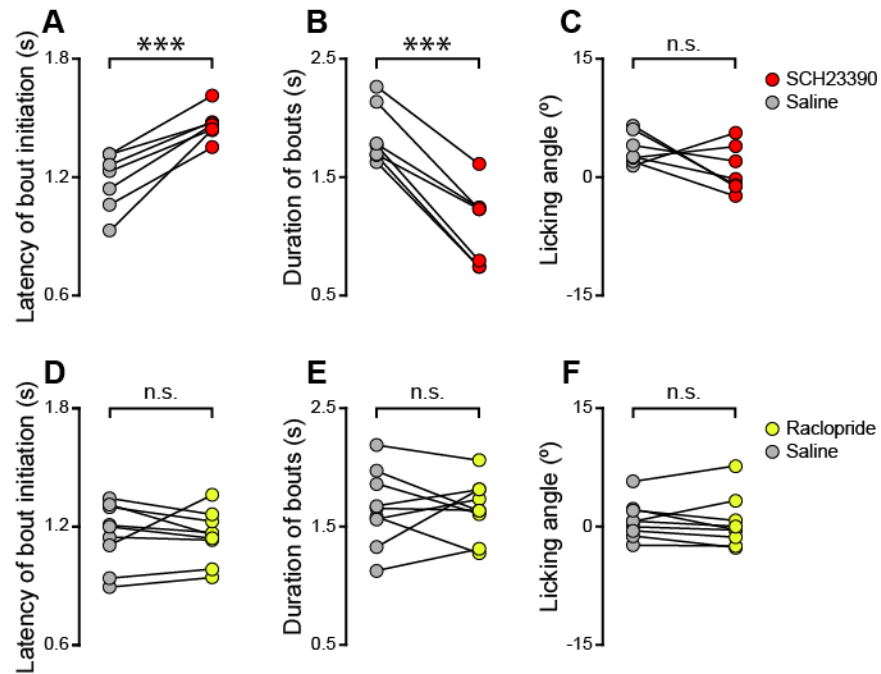

735

736 **Figure 6.** Effects of acute, local infusions of D1 and D2 receptor antagonists in ALM on licking.

737 **A, B and C,** Latency of bout initiation (**A**), duration of licking bouts (**B**) and licking angle (**C**)

738 recorded after unilateral infusion in ALM of saline (gray circles) or the D1 receptor antagonist,

739 SCH23390 (red circles) (n = 7, paired t-test, \*\*\* p<0.001, n.s. indicates not significant). **D, E and**

740 **F,** Latency of bout initiation (**D**), duration of bouts (**E**) and licking angle (**F**) recorded after

741 unilateral infusion in ALM of saline (gray circles) or the D2 antagonist, raclopride (yellow circles)

742 (n = 9, paired t-test, n.s. indicates not significant).

743

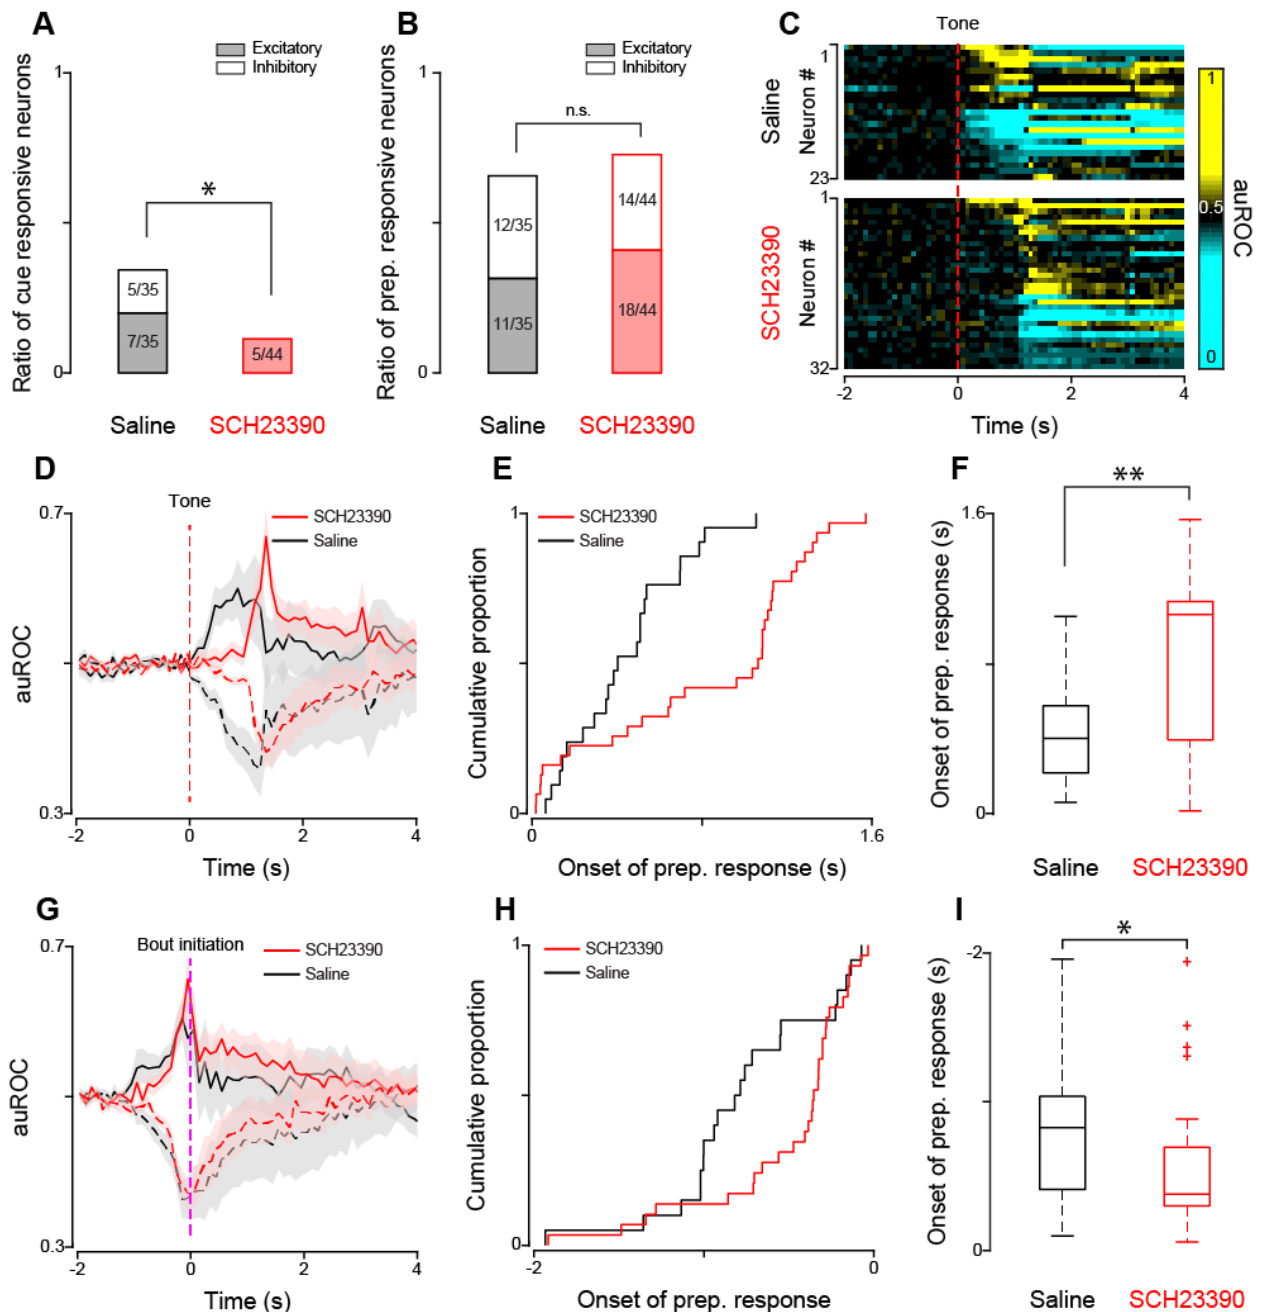

744

745 **Figure 7.** Effects of acute, local blockade of D1 receptor on patterns of single neuron activity in  
 746 ALM. **A and B**, Proportion of neurons with cue responses (**A**) and preparatory responses (**B**)  
 747 recorded with infusion of saline (black) and infusion of D1 receptor antagonist SCH23390 (red)  
 748 in ALM (Pearson's  $\chi^2$  test, \*  $p < 0.05$ , n.s. indicates not significant). **C**, Population plot of  
 749 preparatory activity in ALM recorded from mice with infusion of saline (top) and D1 receptor

750 antagonist SCH23390 (bottom). Each row represents a neuron and the color of each square along  
751 the x axis represents the normalized (auROC) firing rate within each 100 ms bin. The dashed red  
752 vertical line (time 0) indicates the onset of the auditory cue. **D**, Population PSTH of preparatory  
753 activity after the infusion of saline (black) and SCH23390 (red). The dashed red vertical line (time  
754 0) indicates the onset of the auditory cue. The shadow area around each curve represents the  
755 corresponding SEM. **E and F**, Cumulative distributions (**E**) and boxplots (**F**) for the latency of  
756 preparatory activity relative to the cue after the infusion of saline (black) and SCH23390 (red)  
757 (Wilcoxon rank-sum test, \*\*  $p < 0.01$ ). **G**, Population PSTH of preparatory activity with the  
758 infusion of saline (black) and SCH23390 (red). The dashed red vertical line (time 0) indicates the  
759 onset of licking bout initiation. The shadow area around each curve represents the corresponding  
760 SEM. **H and I**, Cumulative distributions (**H**) and boxplots (**I**) of the latency of preparatory activity  
761 relative to the licking bout initiation with the infusion of saline (black) and SCH23390 (red)  
762 (Wilcoxon rank-sum test, \*  $p < 0.05$ ).

763
